# Supplementary material
Source: PubMed Central journal article supplement (PMC3234722)
Supplement: supp_M111.274191_jbc.M111.274191-2.pdf [file supp_M111.274191_jbc.M111.274191-2.pdf]

**Supplementary Figure S1. Screening of the Ras Superfamily members (Rho, Ras, Arf subfamily) for novel ELMO interactors.** (A) A yeast two-hybrid screen using ELMO1 as bait screened a mouse embryonic brain cDNA. DOCK family members (DOCK180-DOCK5) and BAI family members (BAI1-3) were identified as known binding partners. Arl4A was discovered as a putative novel ELMO interactor among the cohort of identified candidates. (B) A yeast two-hybrid screen of 84 Ras family GTPases, identified two binding partners (highlighted in red) as positive for ELMO1 interaction. RhoG (from Rho subfamily) is a known ELMO partner, while Arl4A (from Arf subfamily) is a newly uncovered binding partner. Yeast strain EGY48 co-transformed with LexA-tagged ELMO1 and the B42 fusion constructs of the indicated Rho, Ras and Arf subfamily members were grown on selective (-Histidine, -Tryptophan, -Leucine) and non-selective (-Histidine, -Tryptophan) medium for a nutrient selective growth assay.
