# Supplementary material
Source: PubMed Central journal article supplement (PMC3234722)
Supplement: supp_M111.274191_jbc.M111.274191-3.pdf [file supp_M111.274191_jbc.M111.274191-3.pdf]

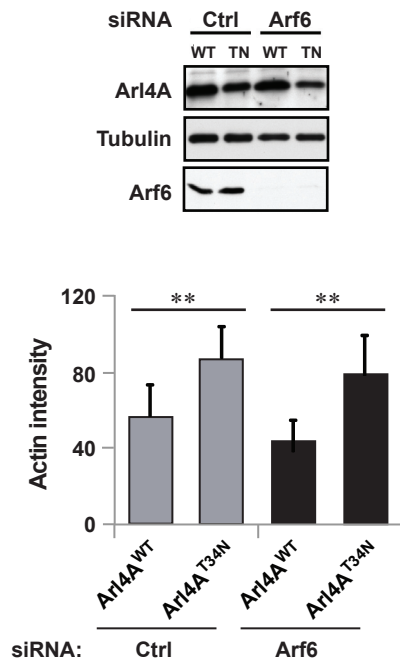

**Supplementary Figure S2. Knockdown of Arf6 does not hinder Arl4A<sup>WT</sup>-induced actin cytoskeleton rearrangement.** HeLa cells expressing constitutively active Arl4A (Arl4A<sup>Q79L</sup>) or dominant-negative Arl4A (Arl4A<sup>T34N</sup>) were transfected with control scramble RNAi or Arf6 RNAi. Cells were then subject to stress fiber disassembly analysis. The bar chart indicates quantification results for each condition. The area of each cell was delineated and the mean fluorescence intensity of Fluor 488 phalloidin was measured in pixels using Image J (NIH). About 50 cells were assessed in each experiment, and data are means  $\pm$  s.e.m. of triplicate experiments (\*\* $P < 0.01$ ).

## Supplementary Figure S2
