# Supplementary material
Source: PubMed Central journal article supplement (PMC3234722)
Supplement: supp_M111.274191_jbc.M111.274191-5.pdf [file supp_M111.274191_jbc.M111.274191-5.pdf]

**Supplementary Table 1** - NCBI sequences used to generate active conformation of GTPases of the Ras superfamily

| Small GTPases        | NCBI Reference Sequence |
|----------------------|-------------------------|
| <b>RHO SUBFAMILY</b> |                         |
| RhoA                 | NM_001664               |
| RhoB                 | NM_004040               |
| RhoC                 | NM_175744               |
| RhoD                 | NM_014578               |
| RhoF                 | NM_019034               |
| RhoG                 | NM_001665               |
| RhoH                 | NM_004310               |
| RhoQ                 | NM_012249               |
| RhoJ                 | NM_020663               |
| RhoU                 | NM_021205               |
| RhoV                 | NM_133639               |
| Rac1                 | NM_006908               |
| Rac2                 | NM_002872               |
| Rac3                 | NM_005052               |
| Cdc42                | NM_001791               |
| Rnd1                 | NM_014470               |
| Rnd2                 | NM_005440               |
| Rnd3                 | NM_005168               |
| RhoBTB1              | NM_014836               |
| RhoBTB2              | NM_001160036            |
| Miro1                | NM_001033568            |
| Miro2                | NM_138769               |
| <b>RAS SUBFAMILY</b> |                         |
| ERas                 | NM_181532               |
| HRas                 | NM_005343               |
| KRas                 | NM_004985               |
| MRas                 | NM_012219               |
| NRas                 | NM_002524               |
| RRas                 | NM_006270               |
| RRas2                | NM_012250               |
| RalA                 | NM_005402               |
| RalB                 | NM_002881               |
| Rap1A                | NM_001010935            |
| Rap1B                | NM_015646               |
| Rap2A                | NM_021033               |
| Rap2B                | NM_002886               |
| Rap2C                | NM_021183               |
| RasD1                | NM_004675               |
| RasD2                | NM_014310               |
| RasL10A              | NM_006477               |

|                      |              |
|----------------------|--------------|
| RasL10B              | NM_033315    |
| RasL11A              | NM_206827    |
| RasL11B              | NM_023940    |
| RasL12               | NM_016563    |
| Rit1                 | NM_006912    |
| Rit2                 | NM_002930    |
| Diras1               | NM_145173    |
| Diras2               | NM_017594    |
| Diras3               | NM_004675    |
| Gem                  | NM_005261    |
| RRad                 | NM_001128850 |
| Rem1                 | NM_014012    |
| Rem2                 | NM_173527    |
| Rheb                 | NM_005614    |
| RhebL1               | NM_144593    |
| Rerg                 | NM_032918    |
| NkiRas1              | NM_020345    |
| NkiRas2              | NM_001001349 |
| <b>ARF SUBFAMILY</b> |              |
| Arf1                 | NM_001024227 |
| Arf3                 | NM_001659    |
| Arf4                 | NM_001660    |
| Arf5                 | NM_001662    |
| Arf6                 | NM_001663    |
| Arl1                 | NM_001177    |
| Arl2                 | NM_001667    |
| Arl3                 | NM_004311    |
| Arl4A                | NM_005738    |
| Arl4C                | NM_005737    |
| Arl4D                | NM_001661    |
| Arl5A                | NM_012097    |
| Arl5B                | NM_178815    |
| Arl5C                | NM_001143968 |
| Arl6                 | NM_032146    |
| Arl8A                | NM_138795    |
| Arl8B                | NM_018184    |
| Arl10                | NM_173664    |
| Arl11                | NM_138450    |
| Arl13A               | NM_001162490 |
| Arl13B               | NM_182896    |
| Arl14                | NM_025047    |
| Arl15                | NM_019087    |
| ArFRP1               | NM_003224    |
| TRIM23               | NM_001656    |
| Sar1A                | NM_001142648 |
| Sar1B                | NM_001033503 |
