# Supplementary material
Source: PubMed Central journal article supplement (PMC3234722)

A

## cDNA Library Screen

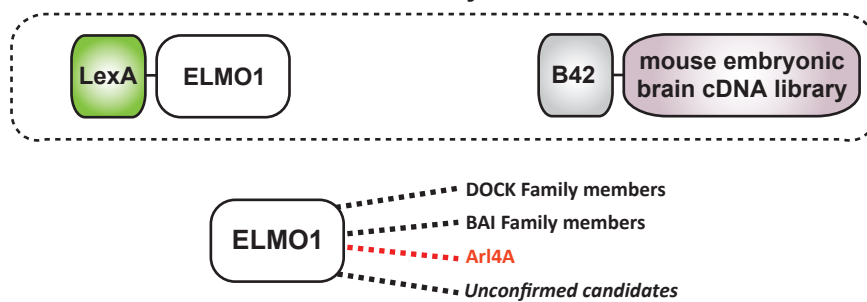

B

## Activated GTPases Screen

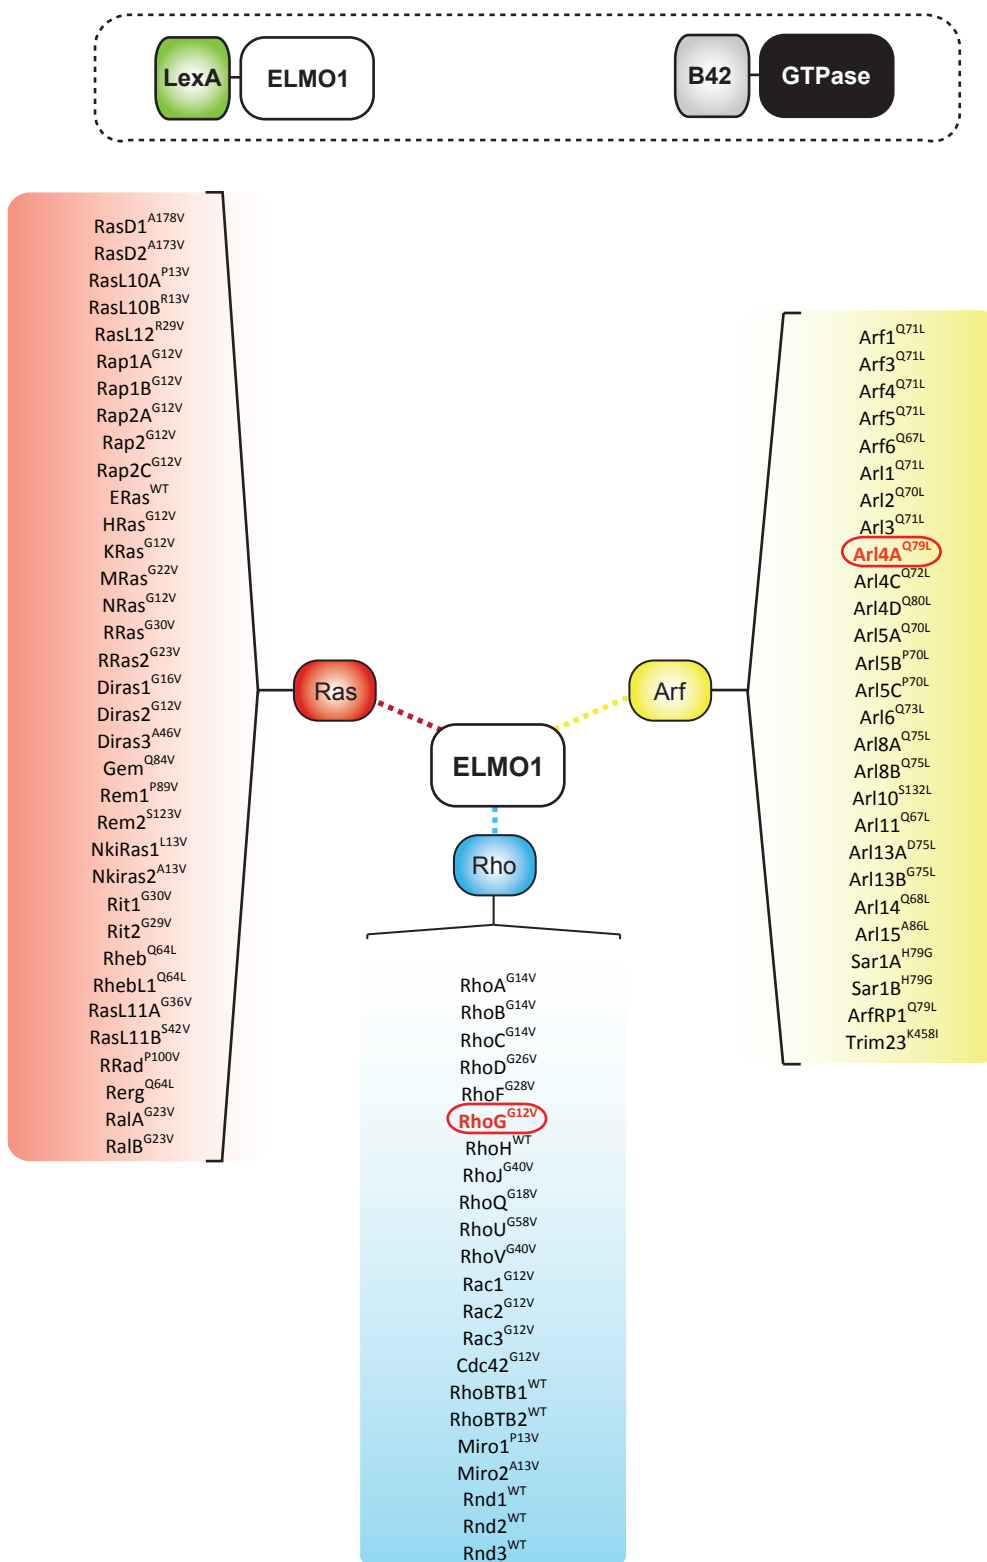

Supplementary Figure S1

Supplement: supp_M111.274191_jbc.M111.274191-1.pdf [file supp_M111.274191_jbc.M111.274191-1.pdf]
